# Supplementary material for: Synergistic effect of biomass-derived carbon decoration and nitrogen defects on seaweed-like tubular g-C3N4 for enhanced photocatalytic H2 evolution
Source: Royal Society of Chemistry journal article supplement (doi:10.1039/d2cy01772e), 2022-01-01
Supplement: d2cy01772e1.pdf [file d2cy01772e1.pdf]

## Supporting Information

# Synergistic effect of biomass-derived carbon decoration and nitrogen defects on seaweed-like tubular g-C<sub>3</sub>N<sub>4</sub> for enhanced photocatalytic H<sub>2</sub> evolution

Weiwei Yu,<sup>a</sup> Xue Zhang,<sup>a</sup> Guanchao Wang<sup>a</sup>, and Zhongkui Zhao<sup>\*a</sup>

<sup>a</sup>State Key Laboratory of Fine Chemicals, Department of Catalysis Chemistry and Engineering, School of Chemical Engineering, Dalian University of Technology, Dalian 116024, P. R. China. \*E-mail: [zkzhao@dlut.edu.cn](mailto:zkzhao@dlut.edu.cn)

### Table of Contents

1. Experimental Section
2. Supplementary Figures
3. References

## 1. Experimental Section

### 1.1 Preparation of photocatalysts

#### 1.1.1 Synthesis of Bulk $g\text{-C}_3\text{N}_4$ (BCN)

BCN was synthesized by thermal polymerizing of urea. In detail, 2 g urea was placed in a quartz boat and in  $\text{N}_2$  flow ( $30 \text{ ml min}^{-1}$ ) at  $550 \text{ }^\circ\text{C}$  for 4 h.

#### 1.1.2 Synthesis of nitrogen deficient $g\text{-C}_3\text{N}_4$ (D-CN)

The D-CN was synthesized according to the previously reported literature with some modifications.<sup>1</sup> In a typical synthesis, 7.5 g urea and 5 mg KOH were dissolved in 15 ml  $\text{H}_2\text{O}$ , and the precursor was obtained by freeze-drying the above mixed solution. As follows, the obtained precursor was placed in a quartz boat, and the thermal polymerization process was performed in  $\text{N}_2$  flow ( $30 \text{ ml min}^{-1}$ ) at  $550 \text{ }^\circ\text{C}$  for 4 h. The obtained sample was filtered and washed with plenty of  $\text{H}_2\text{O}$ , dried in an oven at  $65 \text{ }^\circ\text{C}$ .

#### 1.1.3 Synthesis of biomass-derived carbon decorated $g\text{-C}_3\text{N}_4$ (C-CN)

In a typical synthesis, 7.5 g urea and 3 mg sodium alginate were dissolved in 15 ml  $\text{H}_2\text{O}$ , and the precursor was obtained by freeze-drying the above mixed solution. The subsequent processing was consistent with that of D-CN, and the obtained sample was named C-CN.

#### 1.1.4 Synthesis of biomass -derived carbon decorated nitrogen deficient $g\text{-C}_3\text{N}_4$ (C/D-CN)

In a typical synthesis, 7.5 g urea, 3 mg sodium alginate and 5 mg KOH were dissolved in 15 ml  $\text{H}_2\text{O}$  and the precursor was obtained by freeze-drying the above mixed solution. The subsequent processing was consistent with that of D-CN, and the obtained sample was named C/D-CN. In order to obtain the best performance catalyst, the dosage of sodium alginate (1, 3, 5, 10 mg) and KOH (3, 5, 7, 10 mg) were optimized.

#### 1.1.5 Synthesis of sodium alginate-derived carbon material (sa-C)

In a typical synthesis, 2 g sodium alginate was dissolved in 100 ml  $\text{H}_2\text{O}$  by magnetic stirring. The resulting solution was freeze-dried for 48 h. As follows, the obtained white powder was placed in a quartz boat, and the thermal polymerization process was performed in  $\text{N}_2$  flow ( $30 \text{ ml min}^{-1}$ ) at  $550 \text{ }^\circ\text{C}$  for 4 h. The black sa-C was filtered and washed with a large amount  $\text{H}_2\text{O}$ , dried in an oven at  $65 \text{ }^\circ\text{C}$ .

### 1.2 Photocatalysts Characterization

The morphologies of the samples were examined by scanning electron microscopy (SEM, JEOL JSM-5600LV SEM) and transmission electron microscopy (TEM) images (JEM-2000EX TEM). X-ray diffraction (XRD) conducted on a D/Max 2400 diffractometer equipped with a  $\text{Cu K}\alpha$  source ( $\lambda = 1.5406 \text{ \AA}$ ) were used to collect the

crystallographic information. The thermal polymerization behavior of the precursors was recorded with a thermogravimetric analyzer (TGA/SDTA851e), and the testing process was performed in N<sub>2</sub> flow (30 ml min<sup>-1</sup>) with 10 °C min<sup>-1</sup> heating rate. The content and distribution of N and C elemental were determined with an elemental analyzer (Vario EL) and element mapping analysis (JEOL JSM-5600LV SEM), respectively. Fourier transform infrared (FT-IR) spectra were recorded on a Bruker EQUINOX55 infrared spectrometer. X-ray photoelectron spectroscopy (XPS) measurements were obtained using an ESCALAB 250 XPS system (Al K $\alpha$  X-ray). All the binding energies were referenced to the C 1s peak at 284.8 eV. Nitrogen adsorption and desorption isotherms were measured on a Beishide apparatus of model 3H-2000PS1 system, and the specific surface areas were calculated via the BET method, and the pore size distributions were calculated via the BJH model (adsorption branch of the isotherm). The UV-Vis diffuse reflectance spectra (DRS) were recorded on a UV-Vis spectrometer (JASCO V-550). The room temperature photoluminescence (PL) spectra were investigated using a fluorescence spectrometer (Hitachi F-7000) and the excitation wavelength is 376 nm.

### 1.3 Photoelectrochemical Measurements

In a conventional three-electrode cell, the transient photocurrent response and electrochemical impedance spectra of samples were investigated on a CHI660e electrochemical workstation. The working electrode is the indium tin oxide (ITO) glass with coating samples, a Pt electrode as counter-electrode and an AgCl/Ag electrode as the reference. The 0.5 M Na<sub>2</sub>SO<sub>4</sub> aqueous solution as electrolyte.

The measurement process of Mott-Schottky plots was consistent with above photoelectrochemical investigations 0.2 M Na<sub>2</sub>SO<sub>4</sub> aqueous solution as electrolyte (pH = 7.1, 25 °C). AgCl/Ag electrode system can be converted to reversible hydrogen electrode (RHE) system by the following formula S1: <sup>2</sup>

$$V_{\text{RHE}} = V_{\text{AgCl/Ag}} + V_{\text{AgCl/Ag VS NHE}}^0 + 0.059 \text{ pH} \quad (\text{S1})$$

Where  $V_{\text{AgCl/Ag VS NHE}}^0$  is 0.1976 V at 25 °C.

### 1.4 Photocatalytic H<sub>2</sub> Evolution

The photocatalytic H<sub>2</sub> production reactions were performed in under 420 nm visible light irradiation. 10 mg photocatalyst, appropriate amount H<sub>2</sub>PtCl<sub>6</sub> (the amount of Pt is 3 % of the photocatalyst) and 10 mL triethanolamine (TEOA) were dispersed in 90 ml distilled water. The air in the reaction system was removed completely by repeatedly air removal and N<sub>2</sub> injection. The experiment process was performed at 15 °C by re-circulating cooling water. The H<sub>2</sub> was detected using a gas chromatography device (GC9790 II, FuLi Instruments,

Zhejiang) equipped with a thermal conductive detector (TCD). Under different wavelength of lights (400, 420, 450 and 520 nm), the H<sub>2</sub> evolution apparent quantum yield (AQY) were obtained.

## 2. Supplementary Figures

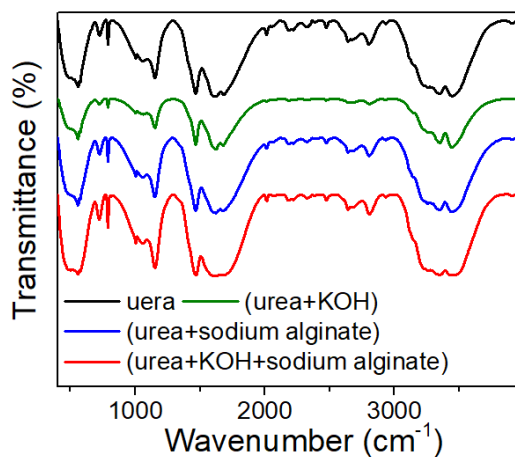

**Figure S1.** FT-IR spectra of the precursors

As shown in Fig. S1, the infrared spectrum lines of (urea + KOH), (urea + sodium alginate) and (urea + sodium alginate + KOH) precursors are the same as that of urea, which indicates that before thermal polymerization, each component of precursors was physical mixing without chemical complexation.

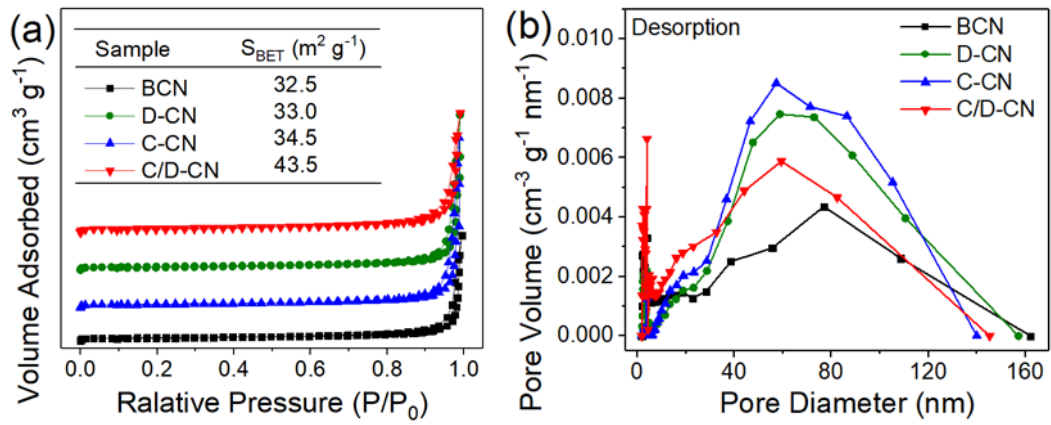

**Figure S2.** (a)  $\text{N}_2$  adsorption-desorption isotherms and (b) BJH pore size distribution of BCN, D-CN, C-CN and C/D-CN.

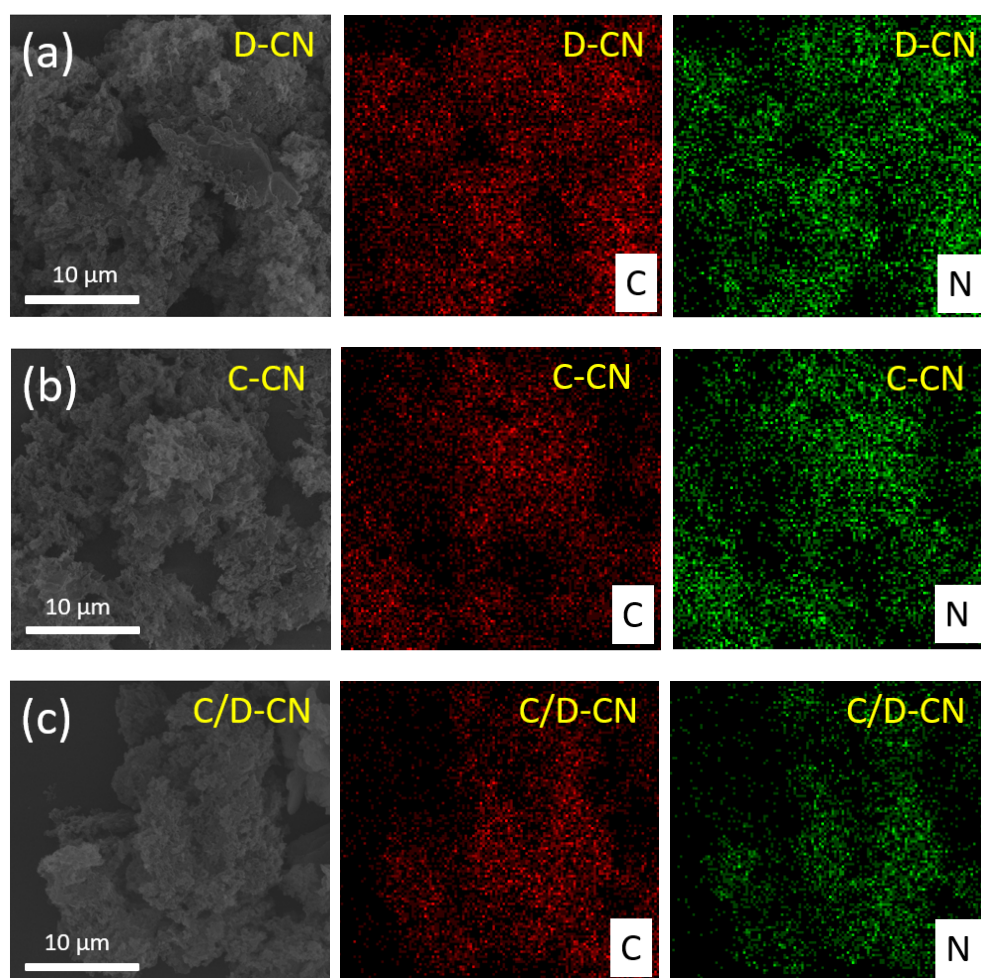

**Figure S3.** SEM images and corresponding EDS mappings of C element and N element of (a) D-CN, (b) C-CN, and (c) C/D-CN.

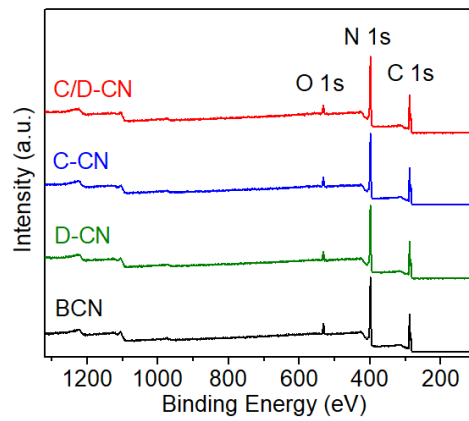

**Figure S4.** XPS full spectra of BCN, D-CN, C-CN and C/D-CN.

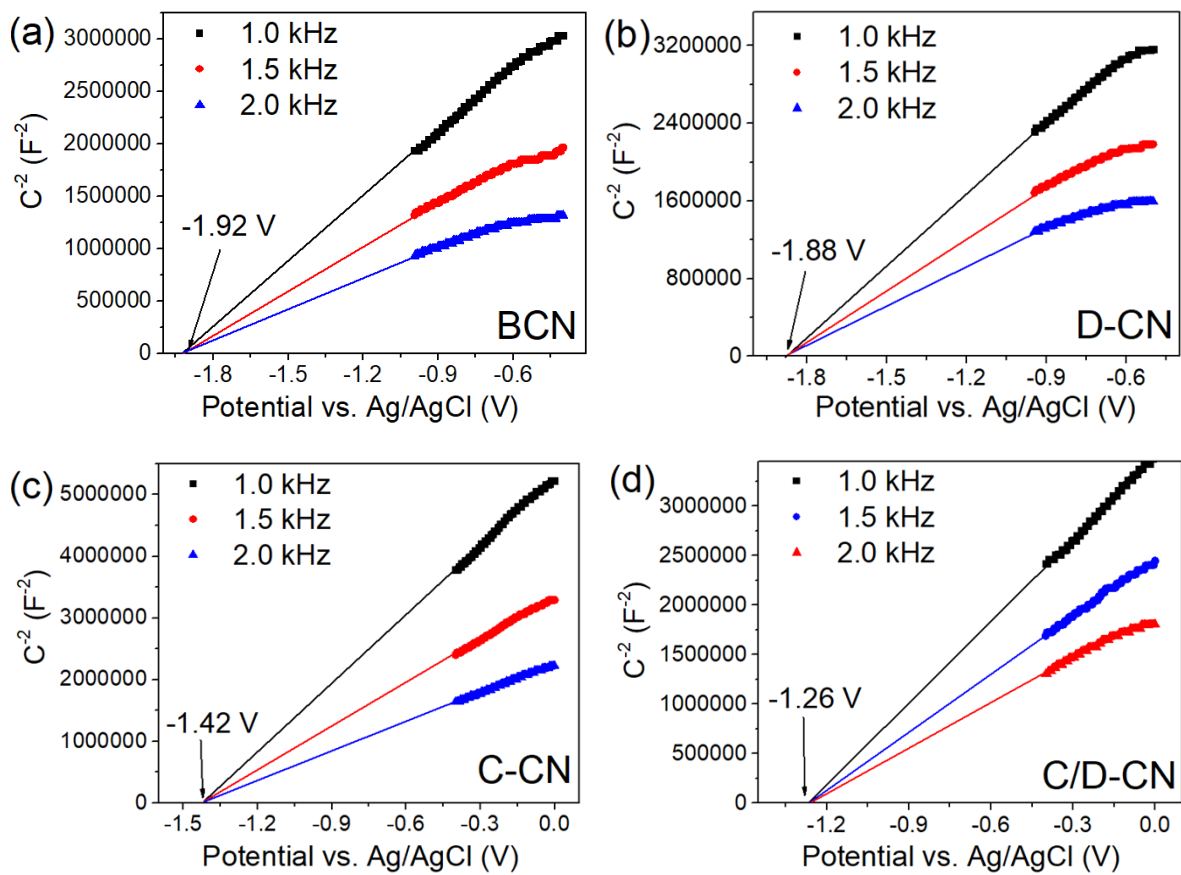

**Figure S5.** Mott-Schottky plots of (a) BCN, (b) D-CN, (c) C-CN, and (d) C/D-CN.



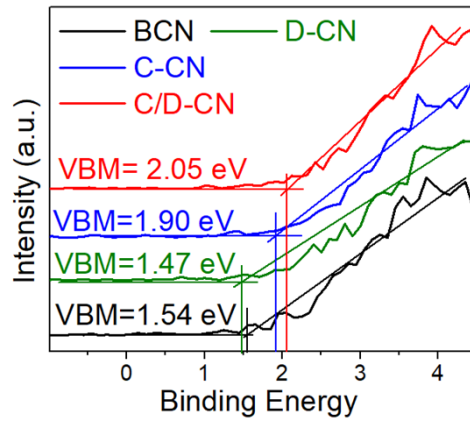

**Figure S6.** VB XPS spectra of BCN, D-CN, C-CN and C/D-CN.

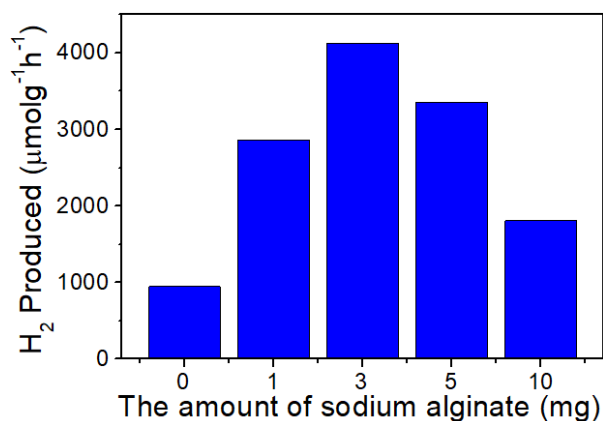

**Figure S7.** Photocatalytic H<sub>2</sub> generation histogram of a series of C/D-CN prepared with various amount of sodium alginate ( $W_{\text{sa}}$ ).

The optimization process of the introduction amount of sodium alginate ( $W_{\text{sa}}$ ):

A series of catalysts were obtained by thermal polymerization of various freeze-dried precursors mixture of 7.5 g urea, 5 mg KOH and x mg ( $x = 0, 1, 3, 5, 10$ ) sodium alginate to investigate the influence of  $W_{\text{sa}}$  on photocatalytic H<sub>2</sub> generation activity, and the results as shown in Fig. S7. Compared with no sodium alginate introduction ( $x = 0$ ), the introduction of sodium alginate ( $x = 1, 3, 5, 10$ ) can significantly improve the photocatalytic activity of the samples. When the  $W_{\text{sa}}$  is 3 mg, C/D-CN shows the highest H<sub>2</sub> generation activity.

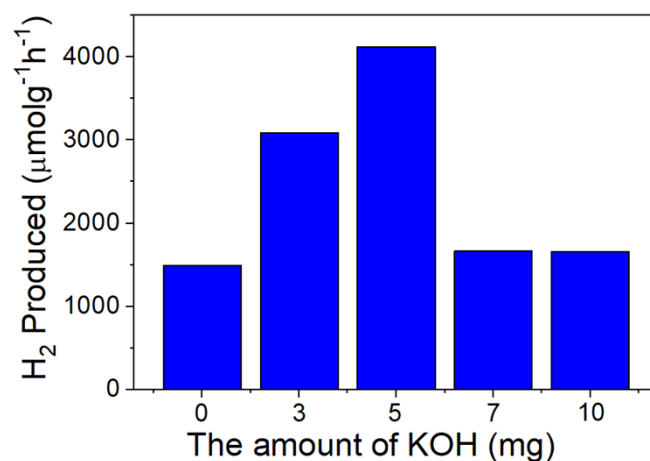

**Figure S8.** Photocatalytic H<sub>2</sub> generation histogram of a series of C/D-CN prepared with various amount of KOH ( $W_A$ ).

The optimization process of the introduction amount of KOH ( $W_A$ ):

A series of catalysts were obtained by thermal polymerization of various freeze-dried precursors mixture of 7.5 g urea, 3 mg sodium alginate and  $y$  mg ( $y = 0, 3, 5, 7, 10$ ) KOH to investigate the influence of  $W_A$  on photocatalytic H<sub>2</sub> generation activity, and the results as shown in Fig. S12. Compared with no KOH introduction ( $y= 0$ ), the introduction of KOH ( $y = 3, 5, 7, 10$ ) can significantly improve the photocatalytic activity of the samples. When the  $W_A$  is 5 mg, C/D-CN shows the highest H<sub>2</sub> generation activity.

### 3. References

- 1 H. Yu, R. Shi, Y. Zhao, T. Bian, Y. Zhao, C. Zhou, G. I. N. Waterhouse, L.-Z. Wu, C.-H. Tung, T. Zhang, *Adv. Mater.*, 2017, **29**, 1605148.
- 2 F. F. Abdi and R. Krol, *J. Phys. Chem. C*, 2012, **116**, 9398-9404.
